# Supplementary material
Source: PubMed Central journal article supplement (PMC4253526)
Supplement: embj0033-2374-sd1.pdf [file embj0033-2374-sd1.pdf]

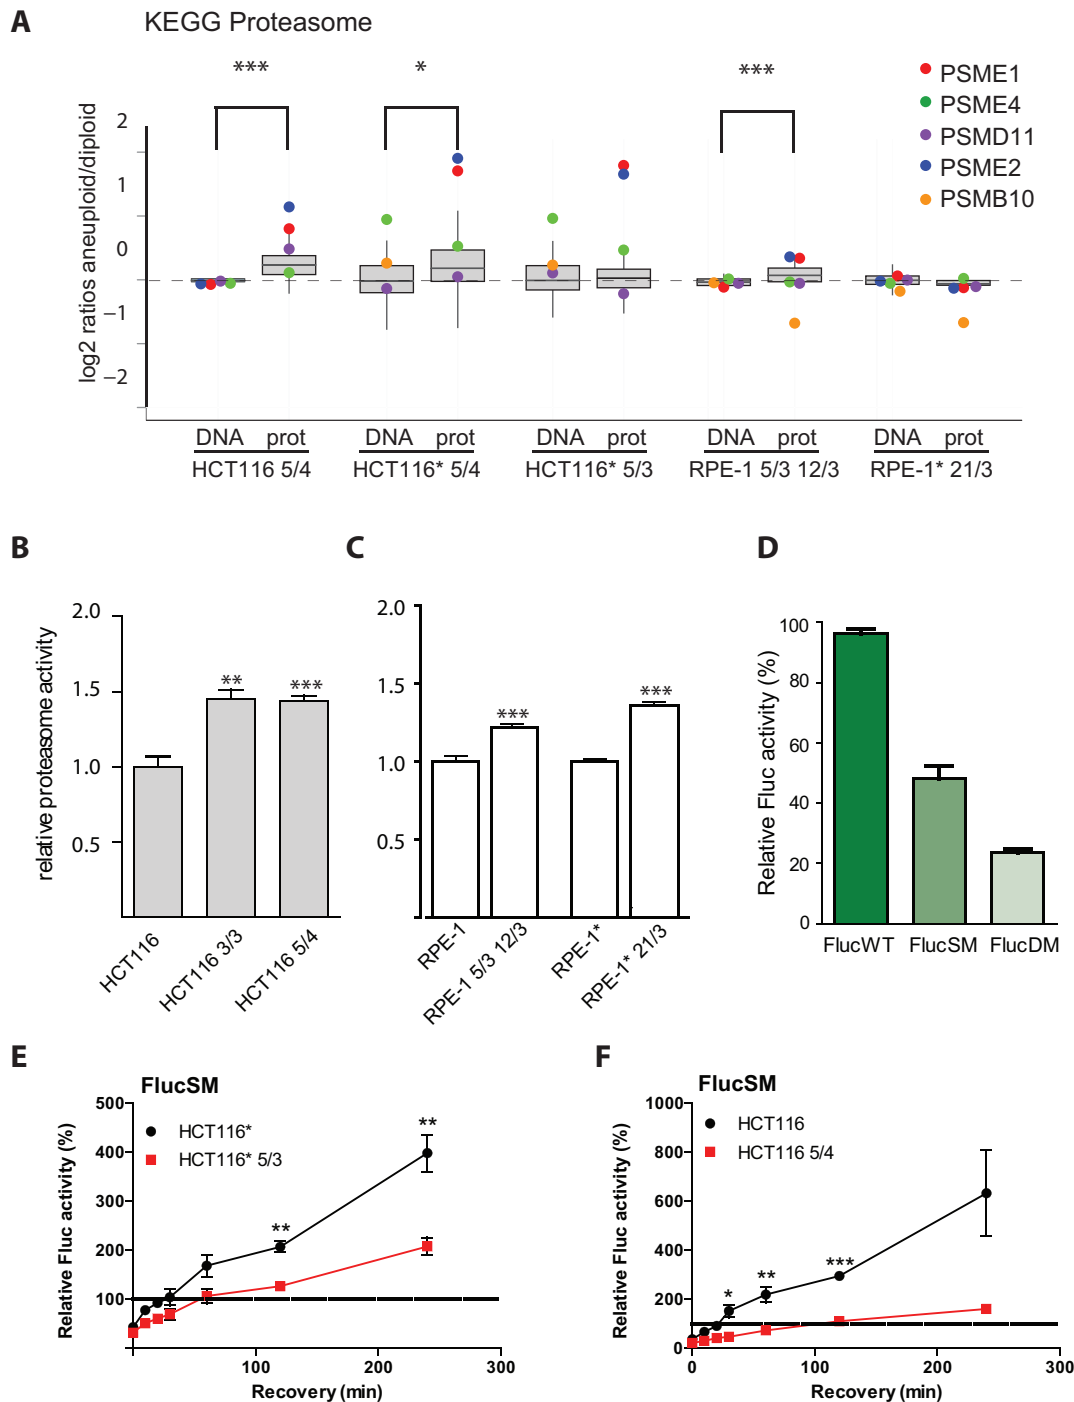

**Figure S1 Protein degradation and protein folding in aneuploid cells**

A. The expression of proteins involved in proteasomal activity is either unchanged or increased in aneuploid cells. Relative abundance of all proteins assigned to the KEGG pathway Proteasome was calculated using the data from Stingle et al., 2012. B. Relative proteasome activity in HCT116 and its aneuploid derivatives measured using the Proteasome-Glo kit (Promega). Mean of three independent experiments and SD are plotted, t-test. C. Relative proteasome activity in RPE-1 and its aneuploid derivatives. Mean of three independent experiments and SD are plotted, t-test. D. Normalized luminiscence activity of Fluc sensors upon treatment with 17-AAG. HCT116 cells were transiently transfected with the respective vectors, and luminiscence activity was measured after 8 hrs treatment with 17-AAG and normalized to the untreated controls. Mean of three independent experiments and SEM are plotted. E, F. HCT116 and its aneuploid derivatives were transfected with FlucSM-mCherry and subjected to heat stress for 2 h at 43 °C. Controls were maintained at 37 °C. Luminiscence was measured at indicated timepoints during recovery at 37 °C. The luminiscence is normalized to the control cells maintained at 37 °C (set to 100% as indicated by dotted line). All plots show the means of at least three independent experiments  $\pm$  SEM, t-test.
