# Supplementary material
Source: PubMed Central journal article supplement (PMC4253526)
Supplement: embj0033-2374-sd2.pdf [file embj0033-2374-sd2.pdf]

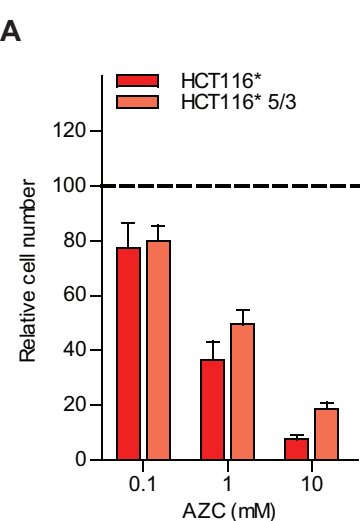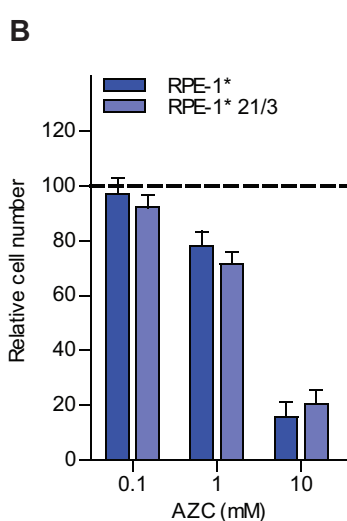

**Figure S2 Sensitivity of aneuploid cell lines to L-Azetidine-2-carboxylic acid (AZC)**

A. Wild-type and trisomic HCT116 cells were treated with the indicated concentrations of AZC and cell number was determined 72 hours thereafter. Cell number is shown as the percentage of the DMSO-treated control. B. Wild-type and trisomic RPE-1 cells were treated as in A and cell number was determined 72 hours thereafter. Cell number is shown as the percentage of the DMSO-treated control. Mean of three independent experiments with SEM are shown.
