# Supplementary material
Source: PubMed Central journal article supplement (PMC4253526)
Supplement: embj0033-2374-sd3.pdf [file embj0033-2374-sd3.pdf]

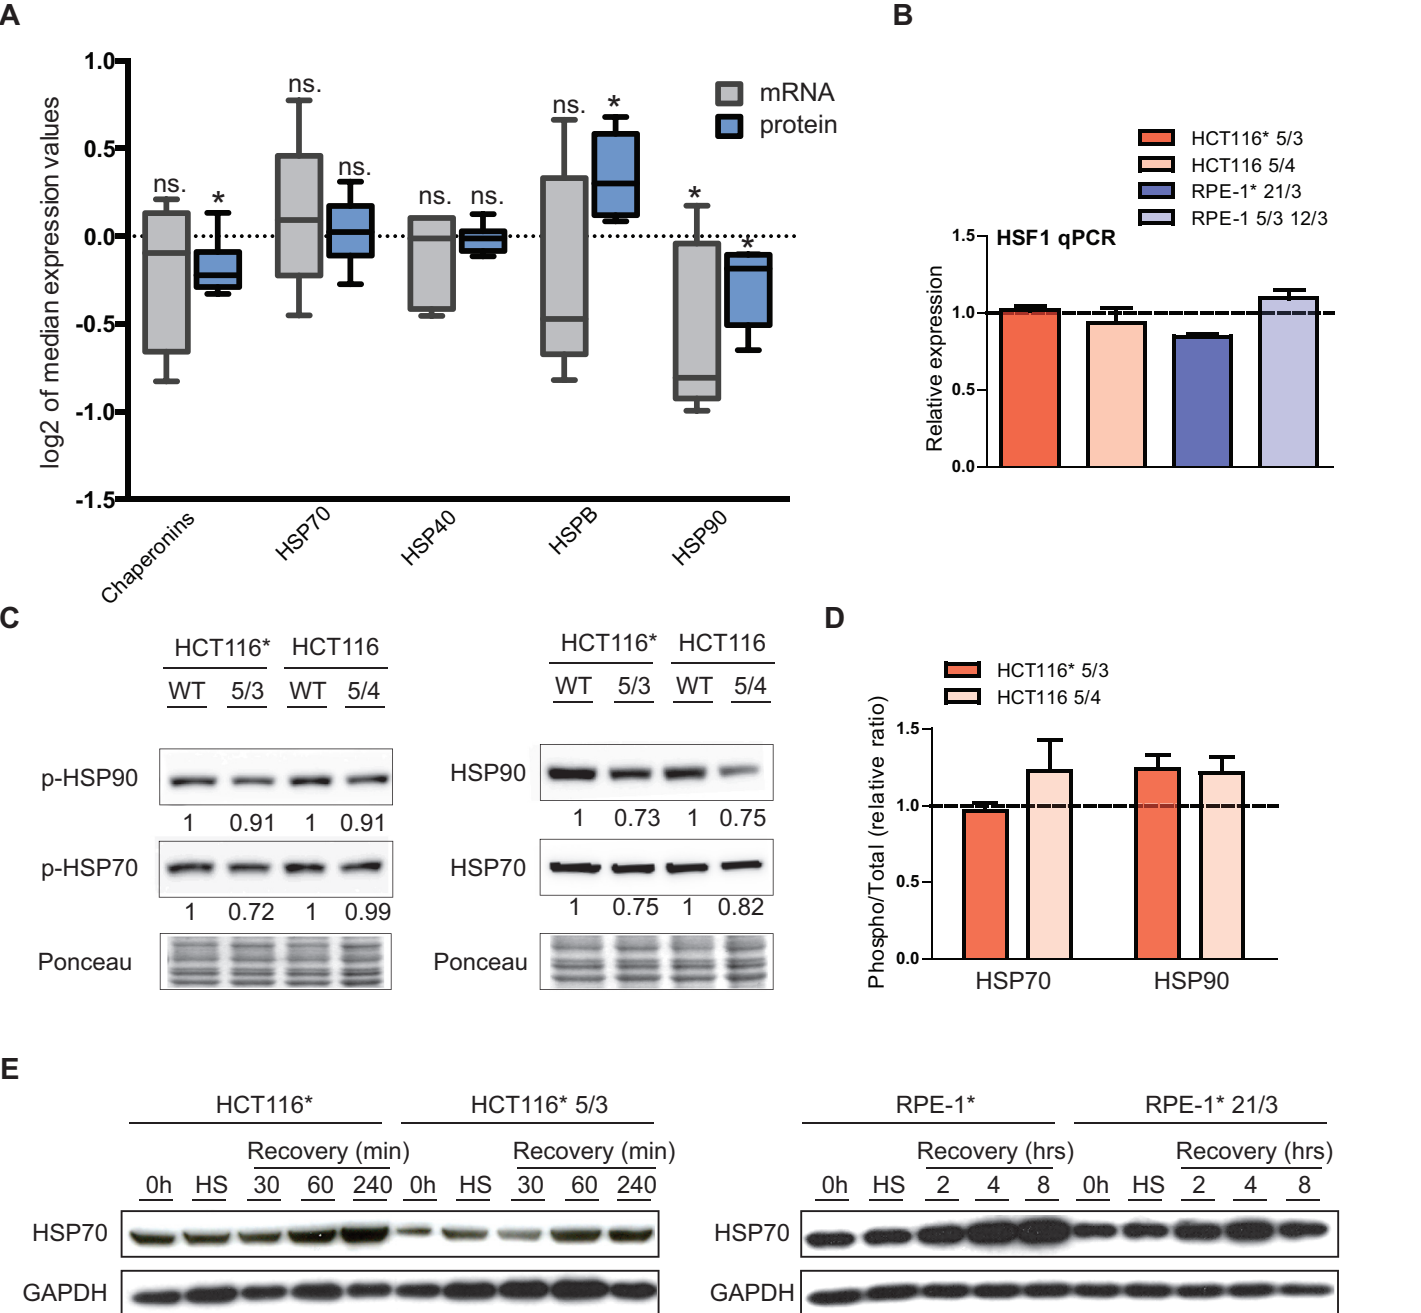

**Figure S3 Summary of heat shock protein expression levels in aneuploid cell lines.**

A. Expression of heat shock protein families in aneuploid cells. Each box plot shows the log<sub>2</sub> median of relative mRNA and protein abundance changes, respectively, in the aneuploid cell lines HCT116 5/4, HCT116 3/3, HCT116\* 5/4, HCT116\* 5/3, RPE-1 12/3 5/3 and RPE-1\* 21/3 compared to corresponding diploid for the indicated HSP gene families. Data from Stingele et al., 2012 and Dürrbaum et al. 2014. Kolmogorov-Smirnov test. B. qPCR analysis of HSF1 mRNA expression in the indicated cell lines. Expression levels are relative to the respective diploid control cell line and normalized to RPL27 expression as housekeeping gene. Mean and standard error of mean is plotted, n=2. C. Phosphorylation of HSP70 and HSP90 in aneuploid cell lines and the parental controls. Expression in the aneuploids is normalized to the respective wild-type (set to 1). Ponceau staining was used as a loading control; n=2. D. Quantification of the ratio of phosphorylated/total protein relative to the respective WT cell line. Mean and standard error of mean is plotted, n=2. E. Western blot analysis of HSP70 induction following heat shock in HCT116- and RPE-1-derived aneuploids. Cells were heat-shocked at 43 °C for 2 hours (HCT116) or 30 minutes (RPE-1) and then allowed to recover at 37 °C for the indicated times. 0h denotes expression in cells at 37 °C at the start of the experiment. Shown are representative blots of experiments performed at least 3 times.
