# Supplementary material
Source: PubMed Central journal article supplement (PMC4253526)
Supplement: embj0033-2374-sd5.pdf [file embj0033-2374-sd5.pdf]

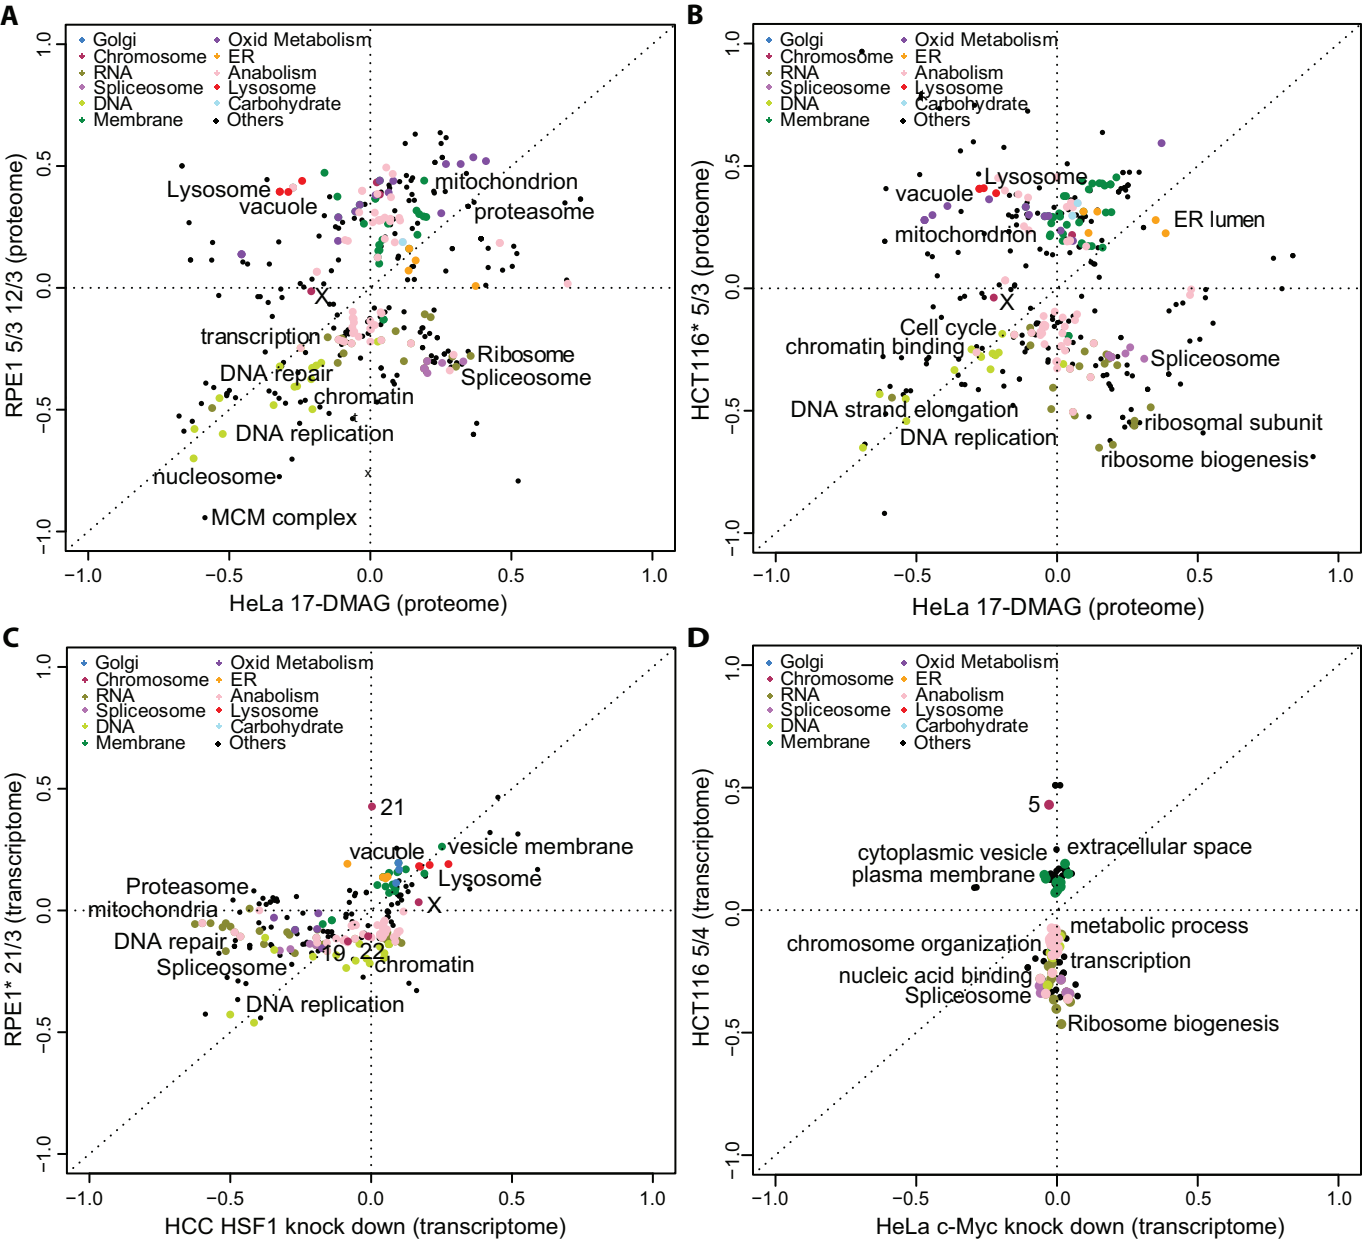

**Figure S5 Comparison of proteome and transcriptome**

A. Changes in pathways identified in the proteome of cells upon inhibition of HSP90 compared to the proteome changes in RPE1 5/3 12/3. B. Changes in pathways identified in the proteome of cells upon inhibition of HSP90 compared to the proteome changes in HCT116\* 5/3. C. Changes in pathway regulation identified in the transcriptome of cells upon HSF1 knockdown compared to transcriptome changes in RPE1\* 21/3. D. Changes in pathway regulation identified in the transcriptome of cells upon c-Myc knockdown compared to transcriptome changes in HCT116 5/4.
