# Supplementary material
Source: PubMed Central journal article supplement (PMC4253526)

Figure 3A

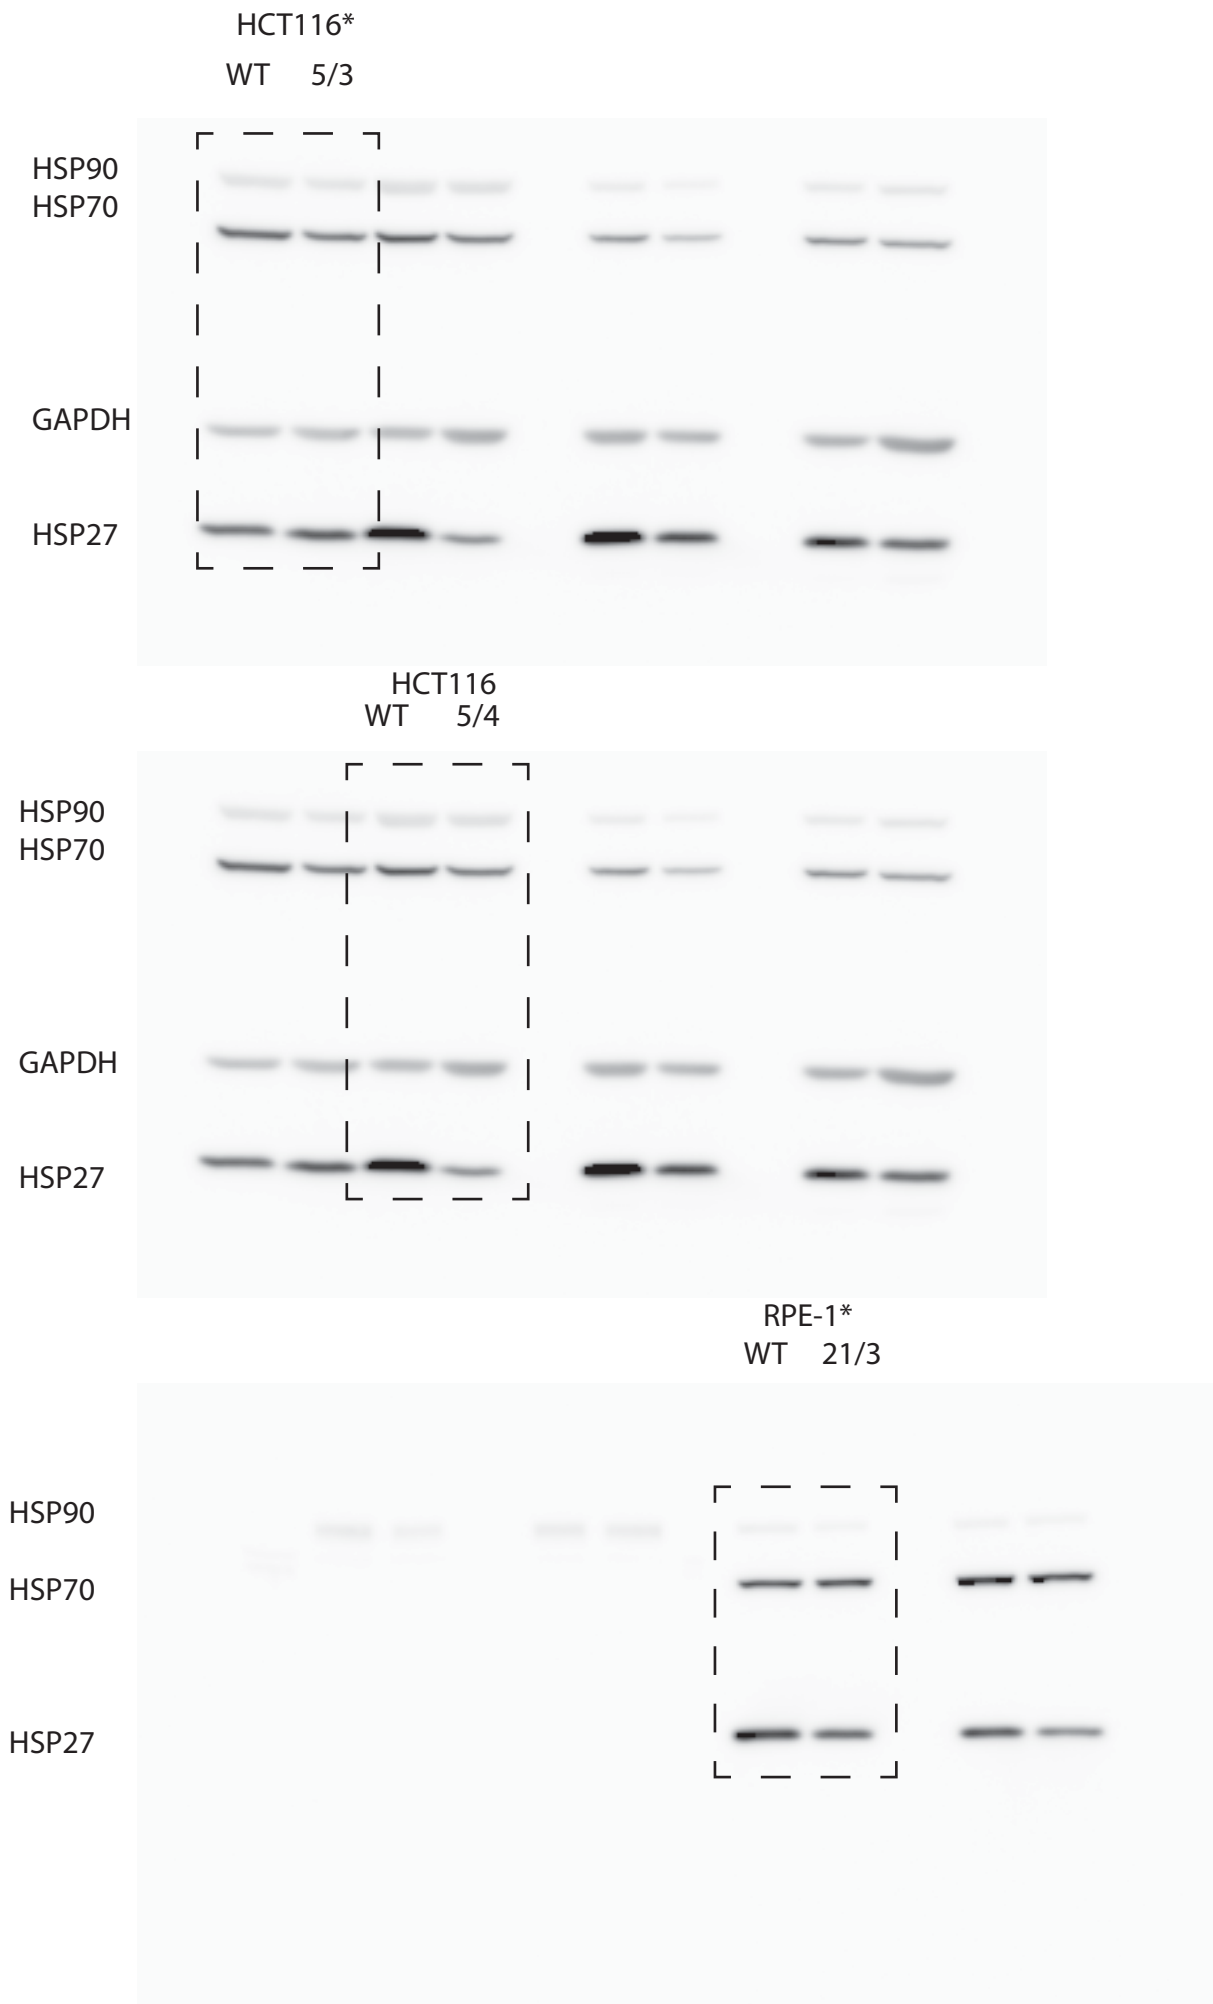

RPE-1\*  
WT 21/3

GAPDH

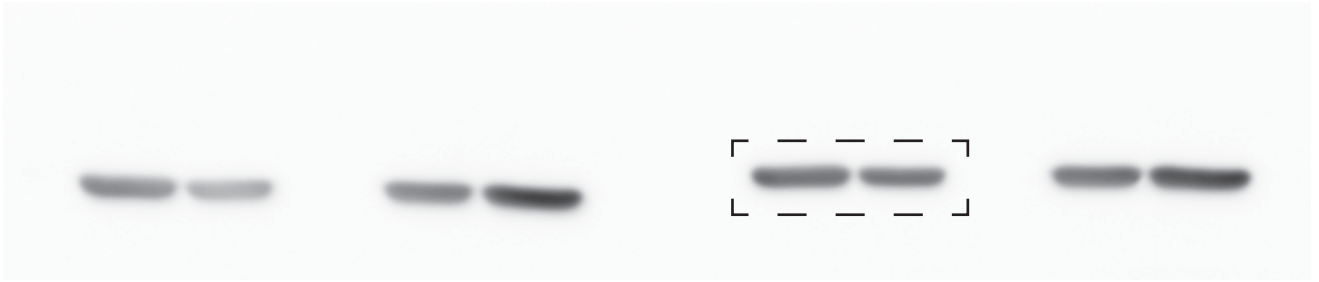

RPE-1  
WT 5/3 12/3

HSP90

HSP70

HSP27

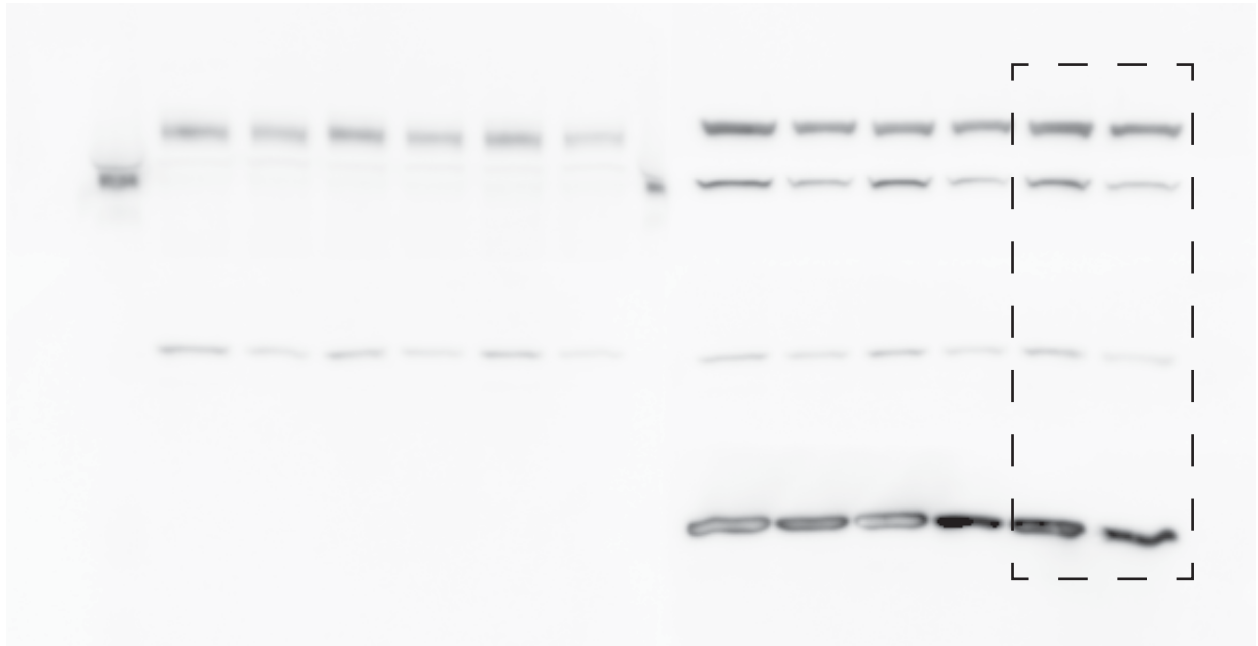

RPE-1  
WT 5/3 12/3

HSC70

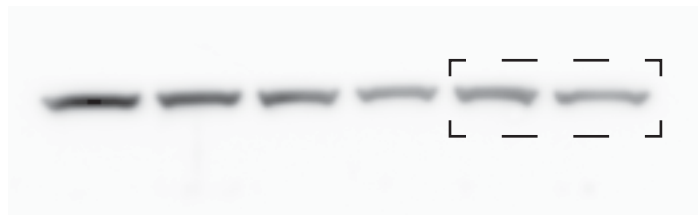

HCT116\*  
WT 5/3

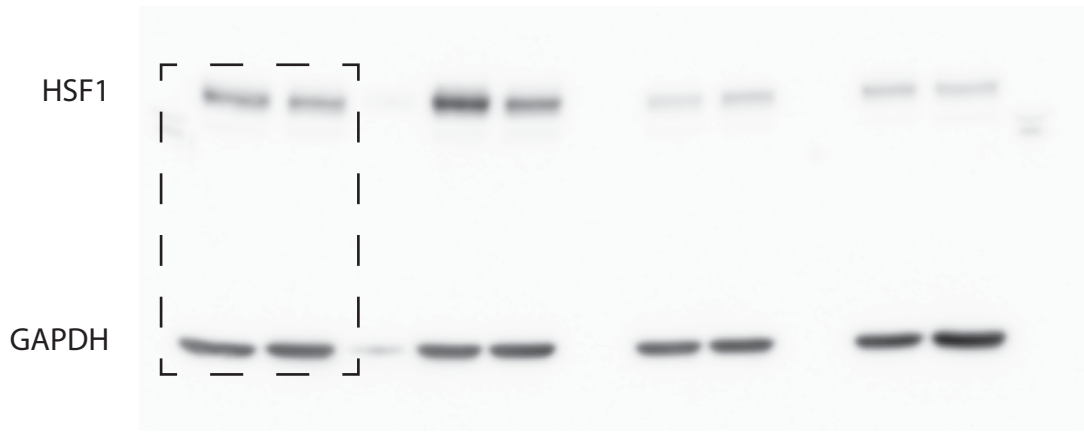

HCT116  
WT 5/4

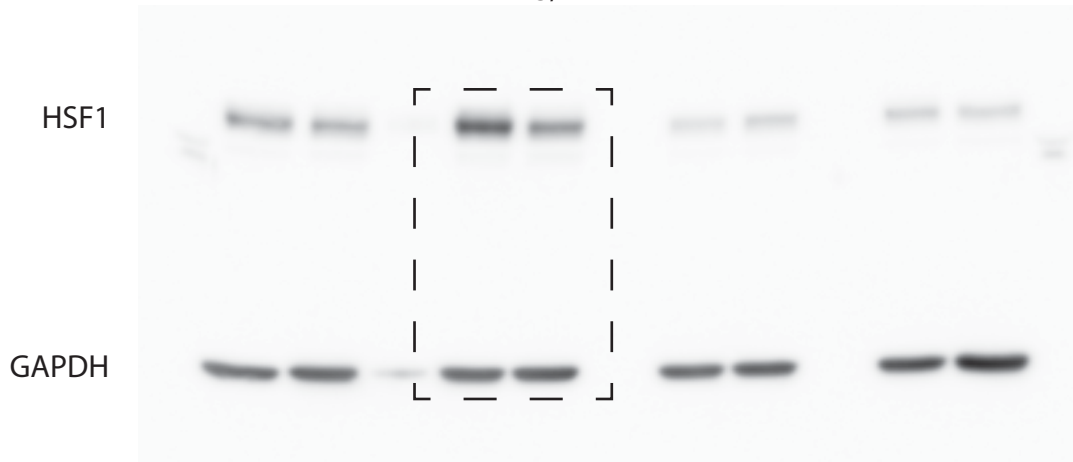

RPE-1\*  
WT 21/3

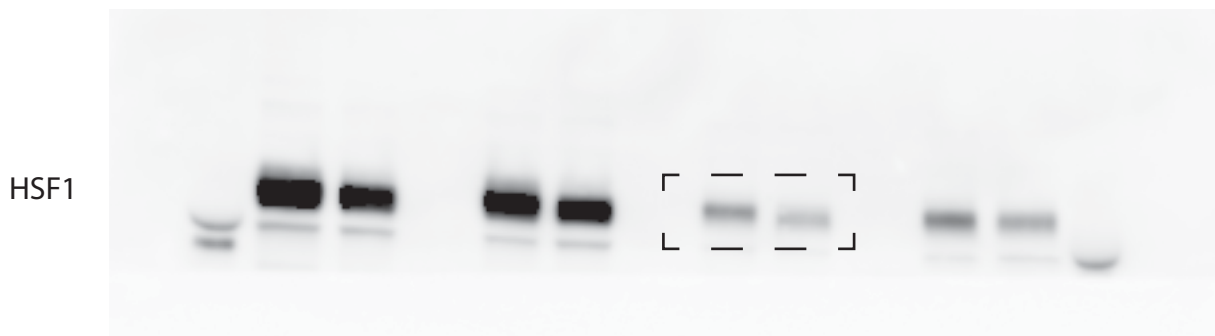

RPE-1\*  
WT 21/3

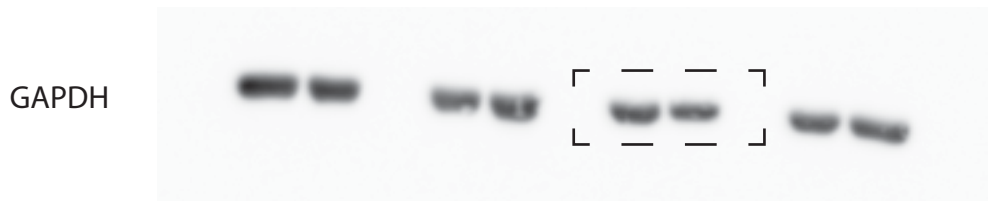

RPE-1  
WT 5/3 12/3

HSF1

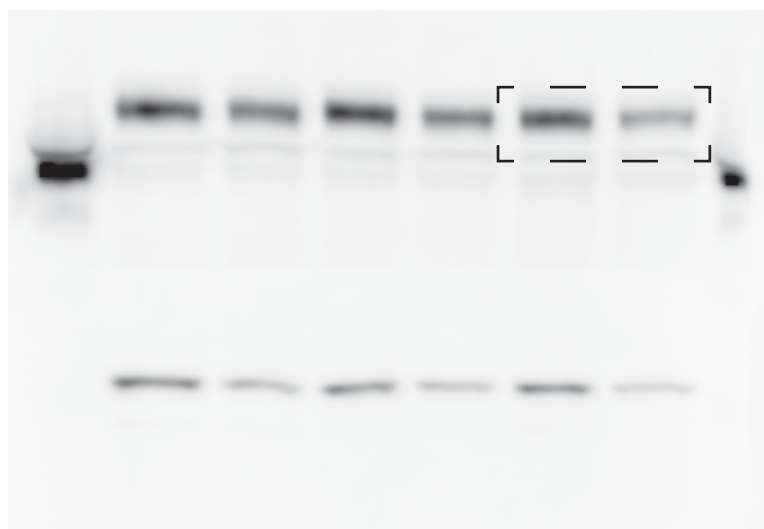

RPE-1  
WT 5/3 12/3

HSC70

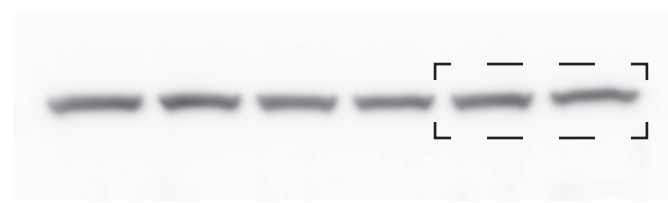

Supplement: embj0033-2374-sd11.pdf [file embj0033-2374-sd11.pdf]
